# Supplementary material for: Key role of hydrochar in heterogeneous photocatalytic degradation of sulfamethoxazole using Ag3PO4-based photocatalysts
Source: Royal Society of Chemistry journal article supplement (doi:10.1039/c9ra07843f), 2019-01-01
Supplement: c9ra07843f1.pdf [file c9ra07843f1.pdf]

## Key role of hydrochar in heterogeneous photocatalytic degradation of sulfamethoxazole using $\text{Ag}_3\text{PO}_4$ -based photocatalysts

Li Zhou<sup>a,b</sup>, Min Cai<sup>a,b</sup>, Xu Zhang<sup>a,b</sup>, Naxin Cui<sup>a,b</sup>, Guifa Chen<sup>a,b</sup>, Guo-yan Zou<sup>a,b\*</sup>

<sup>a</sup>Institute of Eco-environment and Plant Protection, Shanghai Academy of Agricultural Sciences, Shanghai 201403, China;

<sup>b</sup>Shanghai Engineering Research Centre of Low-carbon Agriculture, Shanghai 201403, China ;

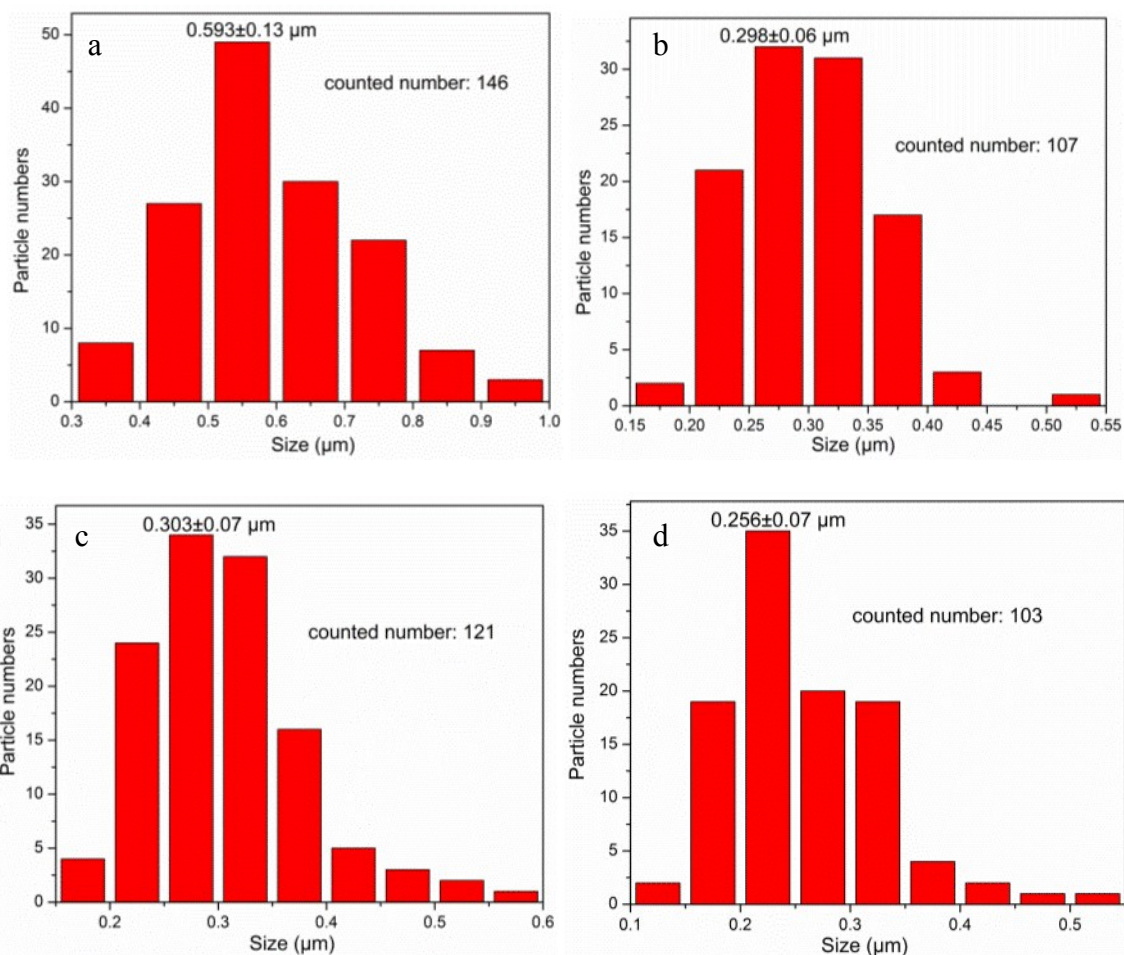

---

\* Corresponding author at: Eco-environmental protection institute, Shanghai academy of agricultural sciences, Shanghai 201403, China. Tel: +86 18817365817, Fax: +86 02162202448

Email address: [zouguoyan@263.net](mailto:zouguoyan@263.net), [joly.zhouli@gmail.com](mailto:joly.zhouli@gmail.com)

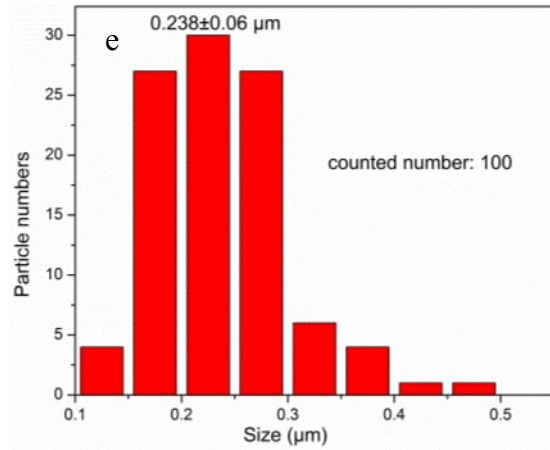

Fig. S1. Particle size distribution of (a)  $\text{Ag}_3\text{PO}_4$ ; (b)  $0.05\text{C}/\text{Ag}_3\text{PO}_4$ ; (c)  $0.1\text{C}/\text{Ag}_3\text{PO}_4$ ; (d)  $0.2\text{C}/\text{Ag}_3\text{PO}_4$ ; and (e)  $0.3\text{C}/\text{Ag}_3\text{PO}_4$

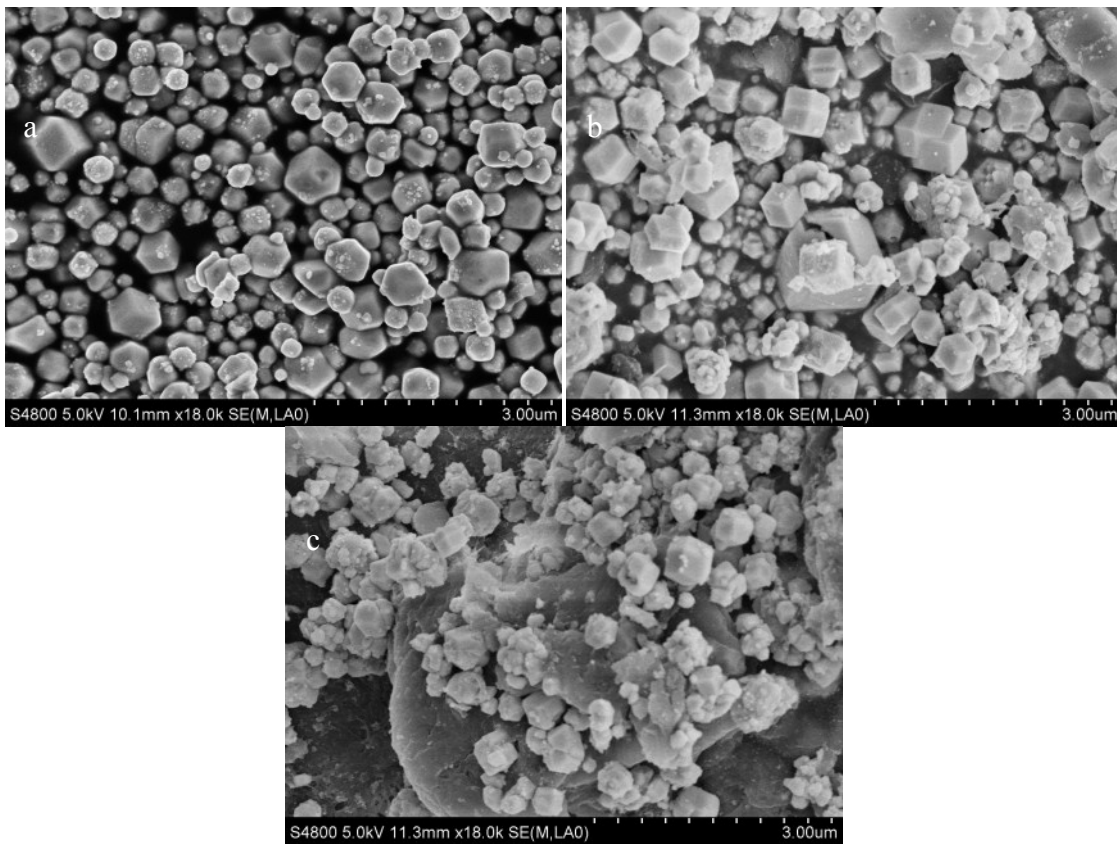

Fig. S2. (a) SEM pictures of (a)  $0.05\text{C}/\text{Ag}_3\text{PO}_4$ ; (b)  $0.2\text{C}/\text{Ag}_3\text{PO}_4$ ; and (c)  $0.3\text{C}/\text{Ag}_3\text{PO}_4$

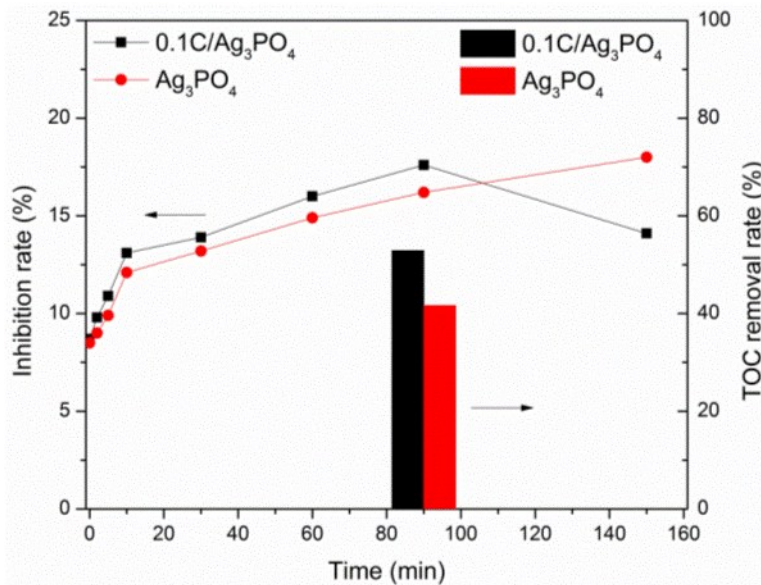

Fig. S3. The change of combined toxicity and TOC removal rate during SMX degradation by Ag<sub>3</sub>PO<sub>4</sub> and 0.1C/Ag<sub>3</sub>PO<sub>4</sub>

It is expected that both the target compound and by-products are degraded completely during the SMX photocatalytic degradation process, so it is important to evaluate the combined toxicity change. As shown in Fig. S3, the inhibition rate on photoacteryium *V. qinghaiensis* sp.-Q67 (Q67) bioluminescence increased gradually from 8.5% to more than 14% for both photocatalysts during the whole photocatalytic process. For 0.1C/Ag<sub>3</sub>PO<sub>4</sub>, while most of the SMX was degraded after 90 min of irradiation, the inhibition rate of the bacteria bioluminescence decreased from 17.6% to 14.1%, indicating that the intermediate products transformed from the SMX were also degraded with the extended illumination time. Meanwhile, although Ag<sub>3</sub>PO<sub>4</sub> was in the process of mainly degrading SMX, the inhibition rate of the bacteria bioluminescence still increased from 16.2% to 18.0%. Our group also observed a similar photocatalytic-degradation phenomenon of the SMX solution by other Ag<sub>3</sub>PO<sub>4</sub>-based composites under visible light illumination<sup>1, 2</sup>. Thus, The intermediate products are more difficult to degrade and have higher toxicity than the target SMX. After 90 min of irradiation, the TOC removal rate is 52.91% for 0.1C/Ag<sub>3</sub>PO<sub>4</sub> and 41.66% for pure Ag<sub>3</sub>PO<sub>4</sub>. The higher TOC removal rate contributed to the enhancement of the photocatalytic activity of 0.1C/Ag<sub>3</sub>PO<sub>4</sub> due to the incorporation of hydrochar.

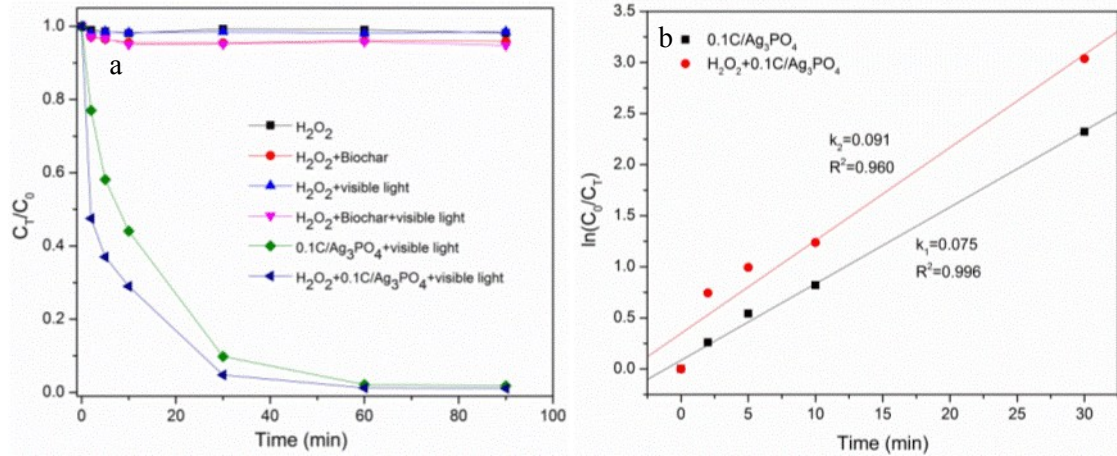

Fig. S4. Removal of SMX under various reaction conditions (a); and photocatalytic rate of  $0.1C/Ag_3PO_4$  and  $H_2O_2+0.1C/Ag_3PO_4$  under visible light irradiation (b).

As shown in Fig. S4(a) and (b), with the photocatalyst  $0.1C/Ag_3PO_4$  under visible light, the addition of 10-mM  $H_2O_2$  can enhance the photocatalytic activity of SMX degradation. The removal rate was  $0.091 \text{ min}^{-1}$ , which is 1.2 times of the only photocatalyst under visible light. A similar result was obtained from other  $Ag_3PO_4$ -based composite photocatalysts. For example, the RhB removal rate of 15 wt%  $Ag_3PO_4$ - $Bi_2MoO_6$ - $H_2O_2$  system ( $k=0.03585 \text{ min}^{-1}$ ) is 7.2 times of only 15 wt%  $Ag_3PO_4$ - $Bi_2MoO_6$  ( $k=0.005 \text{ min}^{-1}$ ) under visible light<sup>3</sup>. The addition of  $H_2O_2$  could affect the photocatalytic process in two aspects. Firstly, the  $H_2O_2$  is prone to adsorb on the catalyst surface, and the adsorbed  $H_2O_2$  would react with holes on the catalyst surface, as shown in Eq<sup>4</sup>:

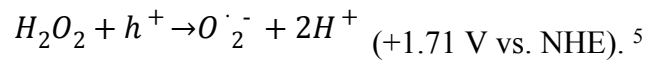

Consumption of holes by adsorbed  $H_2O_2$  could result in a retarded SMX photocatalytic degradation. On the other hand, as electron scavengers,  $H_2O_2$  could react with electrons as shown in Eq.<sup>6</sup>

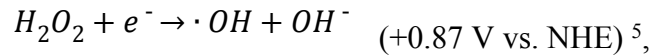

which would increase the separation efficiency of photogenerated electrons and holes and thus facilitate the activity by synergetic effects.

In this case, the reasons of enhanced performance of the  $0.1C/Ag_3PO_4$ - $H_2O_2$  system may be assigned to two aspects. The first reason is that it is easier for holes produced in the photocatalyst valence band to contact with SMX than with adsorbed  $H_2O_2$ <sup>7</sup>, because the

potential difference between the valence band (VB) of  $\text{Ag}_3\text{PO}_4$  and  $\text{O}_2^-/\text{H}_2\text{O}_2$  (+1.71 V/NHE) <sup>5</sup> ( $\Delta E=1.19$  V) is small compared to the difference between the potential of the VB of  $\text{Ag}_3\text{PO}_4$  and the oxidation potential of SMX (0.9 V) <sup>8</sup> ( $\Delta E=2.0$  V). The other reason is that the biochar facilitates the transfer of electrons produced in the conduction band (CB) of the photocatalyst, and the transferred electrons could be trapped preferentially by  $\text{H}_2\text{O}_2$  to form  $\cdot\text{OH}$ . This is because of the larger potential difference between the CB reduction potential of  $\text{Ag}_3\text{PO}_4$  and  $\cdot\text{OH}/\text{H}_2\text{O}_2$  ( $\Delta E = 0.42$  V) compared to the CB reduction potential of  $\text{Ag}_3\text{PO}_4$  and  $\text{O}_2/\text{H}_2\text{O}_2$  ( $\Delta E = 0.245$  V), which benefits the electron-trapping process of  $\text{H}_2\text{O}_2$ . According to the above analysis, the enhanced photocatalytic activity of the 0.1C/ $\text{Ag}_3\text{PO}_4$ - $\text{H}_2\text{O}_2$  system is complementary evidence that holes are the crucial radicals to oxidize SMX in this case.

## References

- 1 L. Zhou, W. Zhang, L. Chen and H. Deng, *Journal of Colloid and Interface Science*, 2017, **487**, 410-417.
- 2 L. Zhou, W. Zhang, L. Chen, H. Deng and J. Wan, *Catalysis Communications*, 2017, **100**, 191-195.
- 3 X. Du, J. Wan, J. Jia, C. Pan, X. Hu, J. Fan and E. Liu, *Materials & Design*, 2017, **119**, 113-123.
- 4 V. Auguliaro, E. Davì, L. Palmisano, M. Schiavello and A. Sclafani, *Applied Catalysis*, 1990, **65**, 101-116.
- 5 B. H. J. Bielski, D. E. Cabelli, R. L. Arudi and A. B. Ross, *Journal of Physical and Chemical Reference Data*, 1985, **14**, 1041-1100.
- 6 E. S. Elmolla and M. Chaudhuri, *Desalination*, 2010, **252**, 46-52.
- 7 R. Hou, X. Chen, Y. Gao, H. Zhu, S. Li, H. Li and Y. Huo, *Chemistryselect*, 2016, **1**, 1000-1003.
- 8 F. Gagné, C. Blaise and C. André, *Ecotoxicology and Environmental Safety*, 2006, **64**, 329-336.
